# Supplementary material for: Induced chiroptical properties of helical Eu(iii) complex by electrostatic interaction with DNA
Source: Royal Society of Chemistry journal article supplement (doi:10.1039/d3ma00708a), 2023-11-14
Supplement: d3ma00708a1.pdf [file d3ma00708a1.pdf]

# Supporting Information

## Induced chiroptical properties of helical Eu(III) complex by electrostatic interaction with DNA

Ziying Li,<sup>1</sup> Nana Hitomi,<sup>1</sup> Hitomi Ohmagari,<sup>2</sup> Hideyuki Tanaka,<sup>2</sup>  
Kazuki Nakamura,<sup>1</sup> Miki Hasegawa,<sup>2</sup> Norihisa Kobayashi<sup>1</sup>

<sup>1</sup>Graduate School of Science and Engineering, Chiba University, 1-33 Yayoi-cho,  
Inage-ku, Chiba 263-8522, Japan.  
[koban@faculty.chiba-u.jp](mailto:koban@faculty.chiba-u.jp)

<sup>2</sup>College of Science and Engineering, Aoyama Gakuin University, 5-10-1 Fuchinobe,  
Chuo-ku, Sagamihara, Kanagawa, 252-5258, Japan.  
[hasemiki@chem.aoyama.ac.jp](mailto:hasemiki@chem.aoyama.ac.jp)

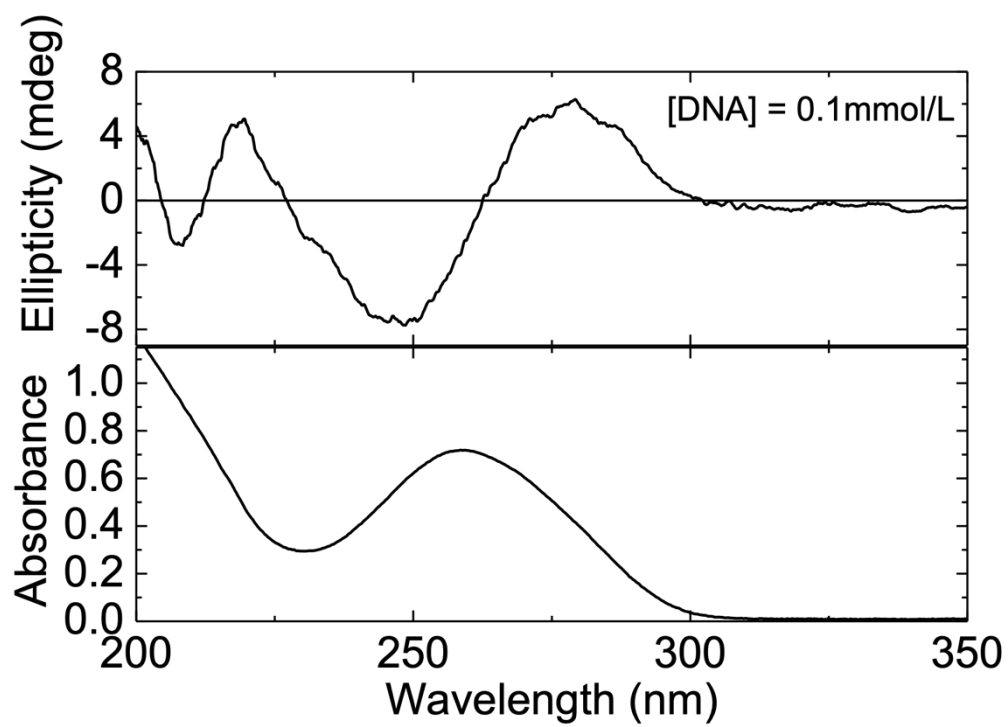

Fig. S1 Absorption (bottom) and CD (top) spectra of DNA. The concentration is 0.1 mmol/L.

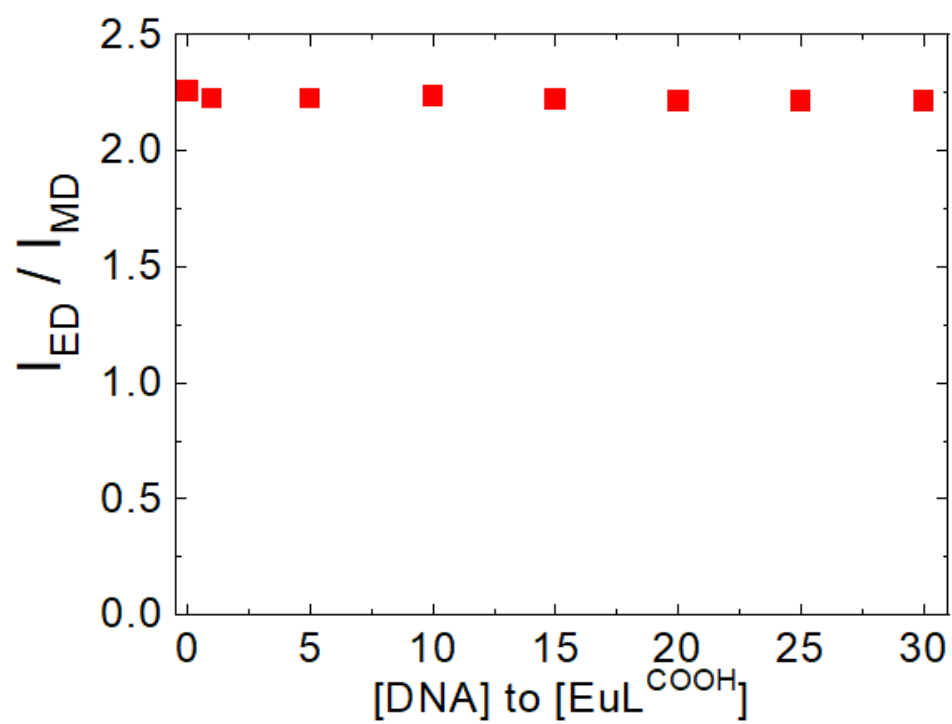

Fig. S2  $I_{rel}$  of  $EuL^{COOH}$  and the DNA/ $EuL^{COOH}$  hybrid solutions.

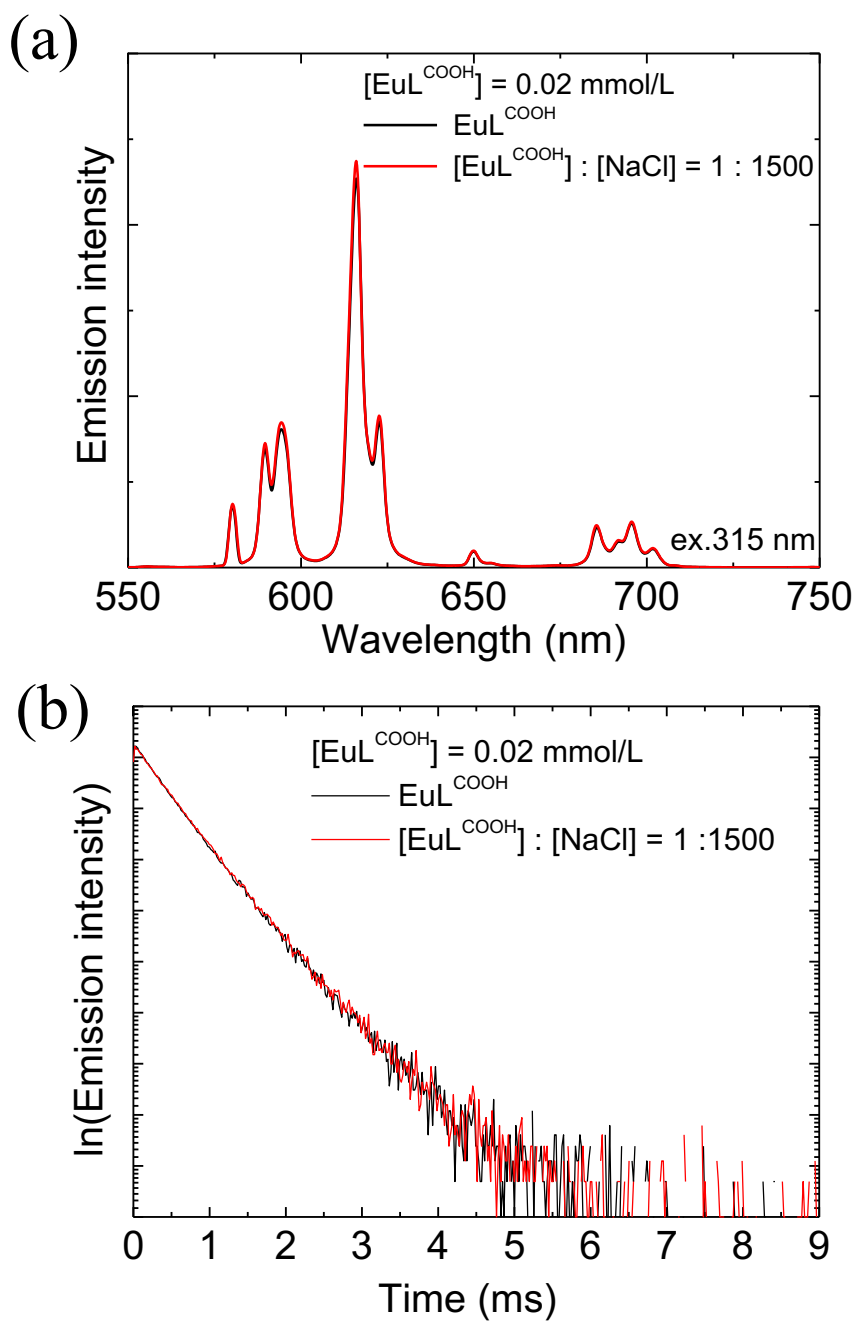

Fig. S3 (a) Emission spectra and (b) emission decay profile of  $\text{EuL}^{\text{COOH}}$  without and with the addition of the excess amount of NaCl (1500 eq. to  $\text{EuL}^{\text{COOH}}$ ).

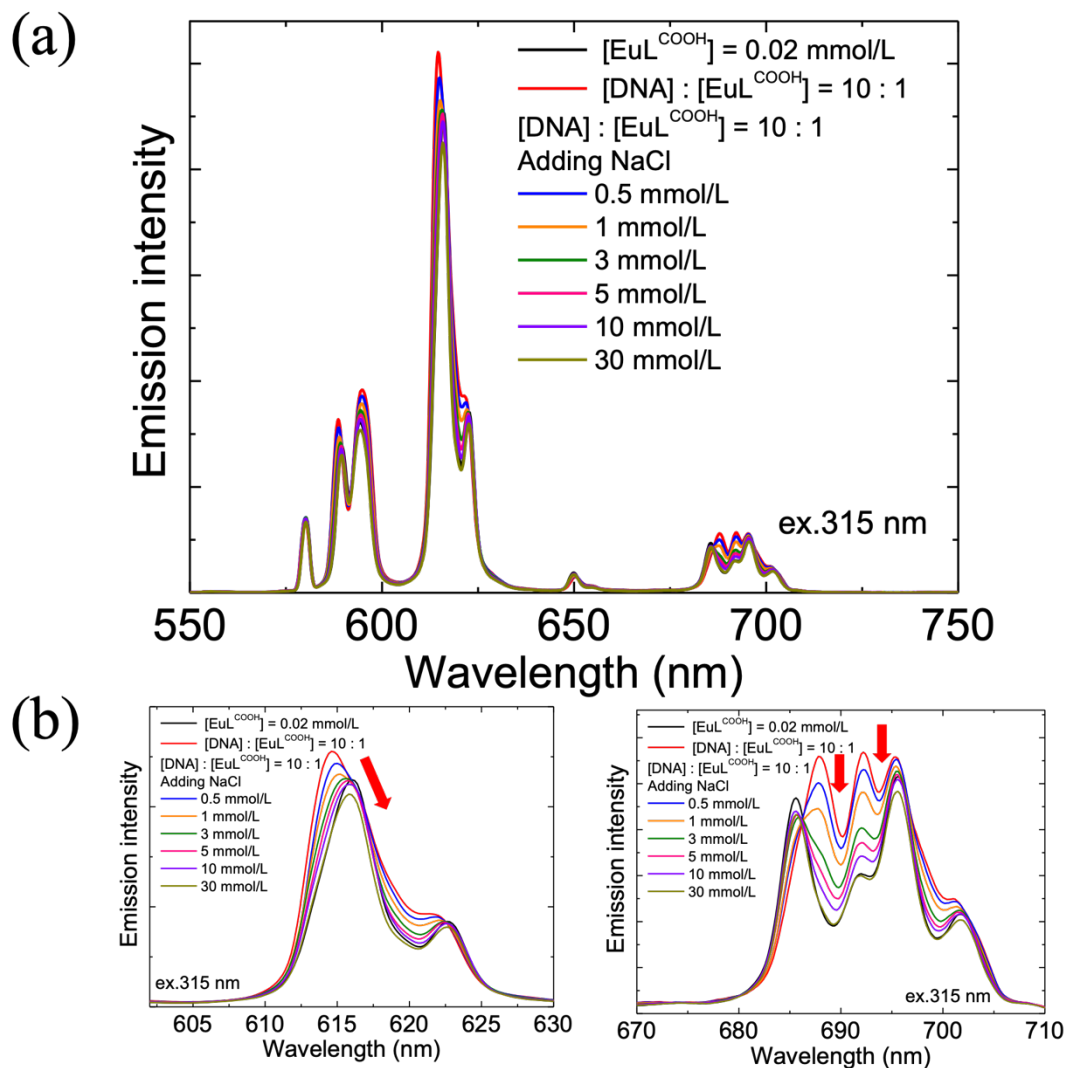

Fig. S4 (a) Emission spectra of  $\text{EuL}^{\text{COOH}}$  and the  $\text{DNA}/\text{EuL}^{\text{COOH}}$  hybrid solutions without and with the addition of NaCl. (b) Emission spectra of the  $\text{DNA}/\text{EuL}^{\text{COOH}}$  hybrid solutions for  ${}^5\text{D}_0 \rightarrow {}^7\text{F}_2$  (left) and  ${}^5\text{D}_0 \rightarrow {}^7\text{F}_4$  (right) without and with the addition of NaCl. The excitation wavelength was 315nm.

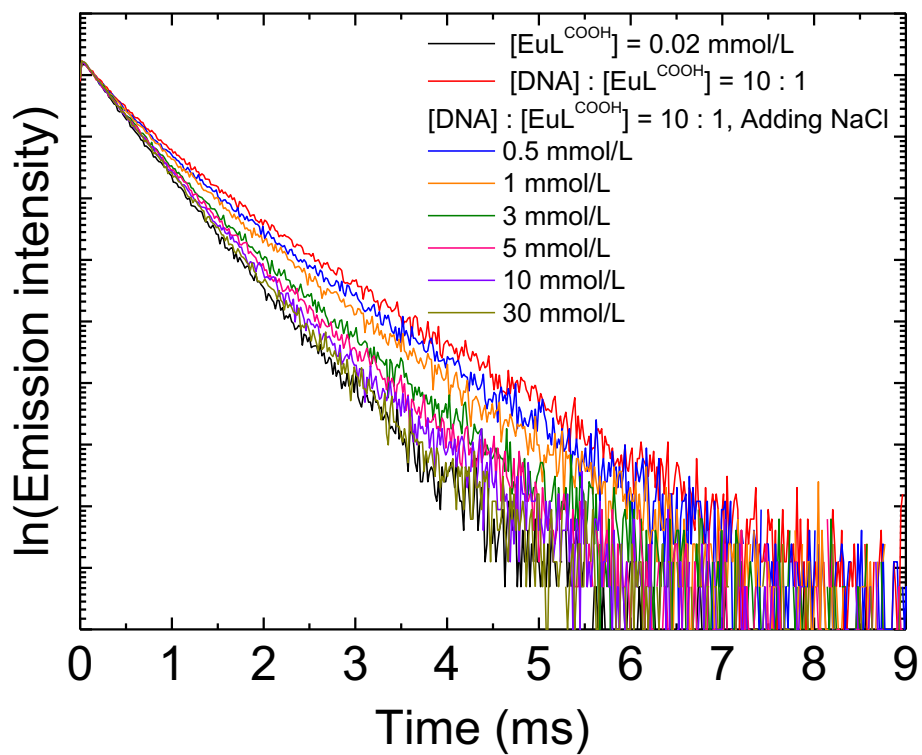

Fig. 5 Emission decay profiles of  $\text{EuL}^{\text{COOH}}$  and the  $\text{DNA}/\text{EuL}^{\text{COOH}}$  hybrid solutions without and with the addition of NaCl.

| [DNA] : [EuL <sup>COOH</sup> ]<br>=10:1 | $\tau_{ave}$ (ms) | $\tau_1$ (ms) | $\tau_2$ (ms) |
|-----------------------------------------|-------------------|---------------|---------------|
| [NaCl] (mmol/L)                         |                   | 0.50          | 1.1           |
| 0                                       | 0.88              | 45.6%         | 54.5%         |
| 0.5                                     | 0.78              | 53.5%         | 46.5%         |
| 1                                       | 0.73              | 61.6%         | 38.5%         |
| 3                                       | 0.65              | 75.4%         | 24.7%         |
| 5                                       | 0.62              | 79.9%         | 20.1%         |
| 10                                      | 0.59              | 85.0%         | 15.0%         |
| 30                                      | 0.56              | 89.8%         | 10.2%         |
| [EuL <sup>COOH</sup> ]                  | 0.53              |               |               |

Table S6 Average emission lifetime ( $\tau_{ave}$ ) and contribution (%) of  $\tau_1$ ,  $\tau_2$  components of EuL<sup>COOH</sup> and the DNA/EuL<sup>COOH</sup> hybrid solution without and with the addition of NaCl.

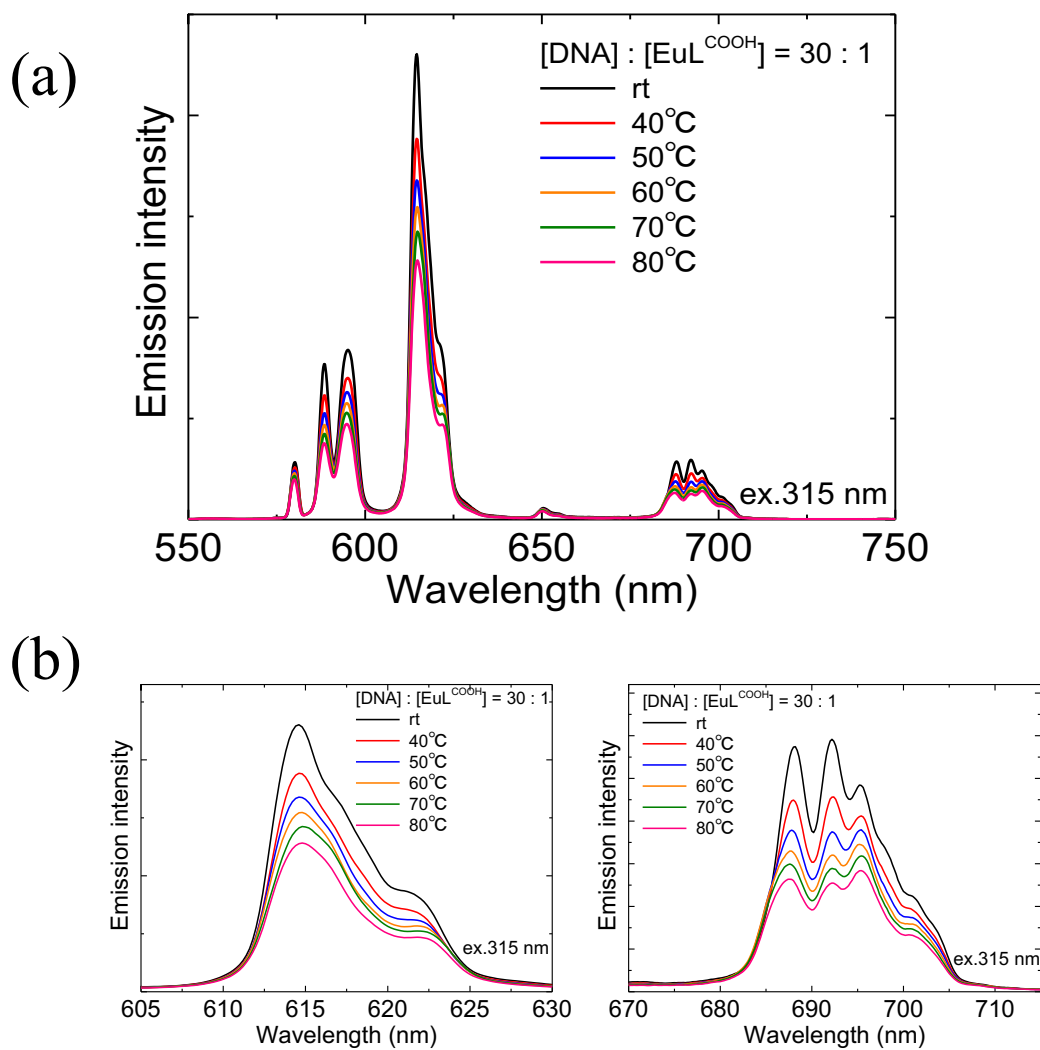

Fig. S7 (a) Emission spectra of EuL<sup>COOH</sup> and the DNA/EuL<sup>COOH</sup> hybrid solution at various temperatures. (b) Emission spectra of the DNA/EuL<sup>COOH</sup> hybrid solution for  $^5D_0 \rightarrow ^7F_2$  (left) and  $^5D_0 \rightarrow ^7F_4$  (right) at various temperatures. The excitation wavelength was 315 nm.



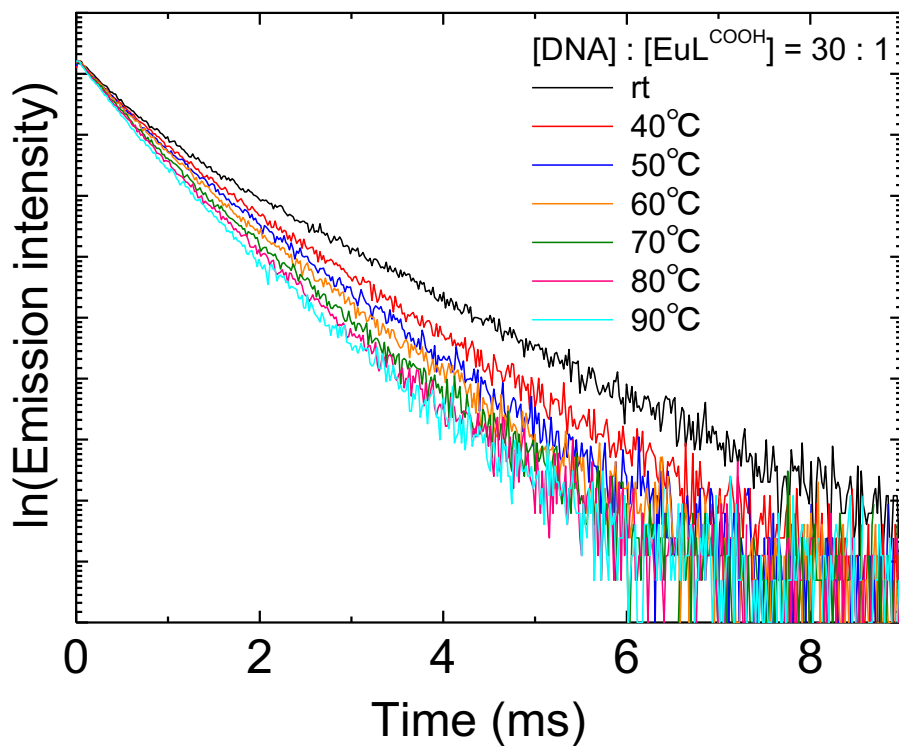

Fig. S8 Emission decay profiles of the DNA/EuL<sup>COOH</sup> hybrid solution at various temperatures.

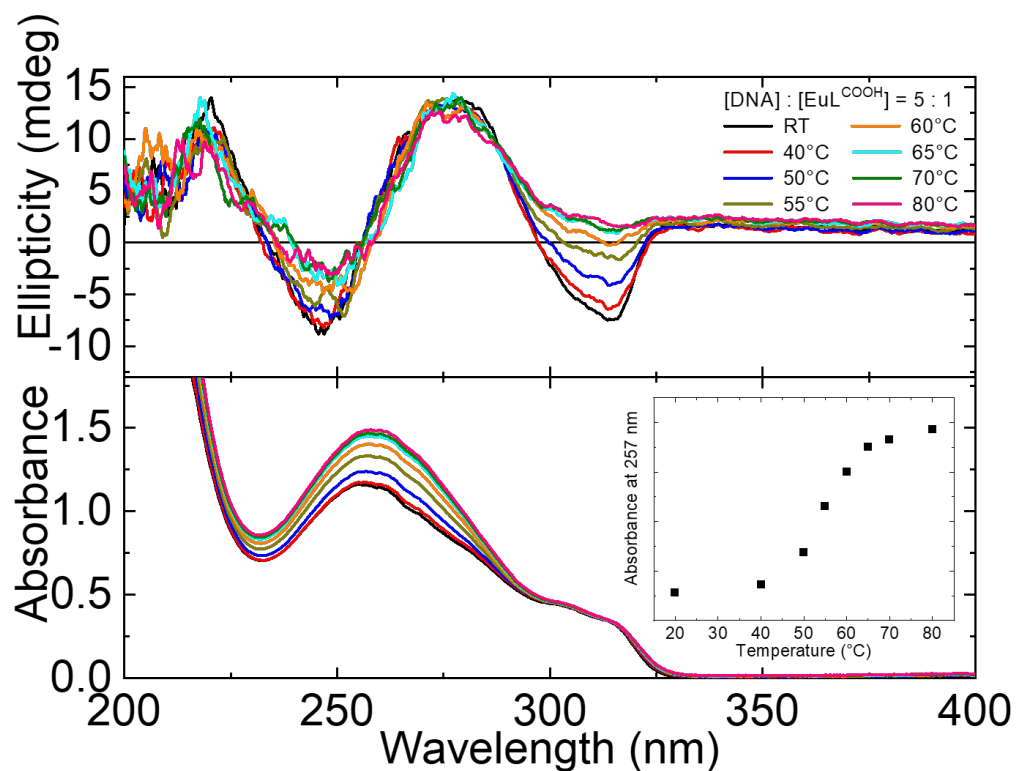

Fig. S9 Absorption (bottom) and CD (top) spectra of the DNA/EuL<sup>COOH</sup> hybrid solution at various temperatures. Insert: the relationship between the temperature and absorbance (257 nm) of DNA.
